# Supplementary material for: mHealth for Clinical Decision-Making in Sub-Saharan Africa: A Scoping Review
Source: JMIR Mhealth Uhealth. 2017 Mar 23;5(3):e38. doi: 10.2196/mhealth.7185 (PMC5383806; doi:10.2196/mhealth.7185)
Supplement: Multimedia Appendix 3 [file mhealth_v5i3e38_app3.pdf]

| Name of Intervention<br>Authors (Year)                                                 | Study design                                | Country<br>Health Domain<br>Target Group              | Type and Characteristics of mCDSS <sup>a</sup>                                                                                                                                                                                                                                                                         | Expected Outcome                                                             | Reported Outcomes                                                                                                                                                                                                                                                     |
|----------------------------------------------------------------------------------------|---------------------------------------------|-------------------------------------------------------|------------------------------------------------------------------------------------------------------------------------------------------------------------------------------------------------------------------------------------------------------------------------------------------------------------------------|------------------------------------------------------------------------------|-----------------------------------------------------------------------------------------------------------------------------------------------------------------------------------------------------------------------------------------------------------------------|
| m4Change <sup>b</sup><br>McNabb et al (2015) [25]                                      | Quantitative pre-post study                 | Nigeria<br>Maternal Health<br>CHEW/HCWs               | -Mobile phone and Tablet<br>-Guided decision support with algorithms for ANC and client data<br>-Health education audio clips for client counselling<br>-Local language support<br>-Offline functionality<br>-Password protected                                                                                       | -Effect on quality of ANC services<br>-Effect on client satisfaction         | -Generally, quality score improved significantly by about 4 points (from 13.3 at baseline to 17.2 at endline)<br>-Not all specific elements of the score significantly improved<br>-Client satisfaction with ANC services significantly improved at end line.         |
| DESIRE (Decision Support and Integrated Record-keeping)<br>Vedanthan et al (2015) [26] | Qualitative usability and feasibility study | Kenya<br>Hypertension<br>Nurses and Clinical Officers | -Tablet-based patient-specific decision-support tool with branching logic algorithm, alerts and reminders.<br>-Integrated with patient data and linked to a central medical records<br>-Offline functionality<br>-Data security via user-authentication, automatic timeouts, encryption and secure transmission system | -Identification of barriers and facilitators to implementing the DESIRE tool | -Technical and human barriers to implementation were identified.<br>-Feasibility themes included facilitators to implementation, provider or patient issues and additional feature requests<br>-Twenty-one unique critical incidents identified in usability testing. |

|                                             |                                                          |                                                                                           |                                                                                                                                                                                                                                                                                                                 |                                                                                                                  |                                                                                                                                                                                                                                                                                                                                                                                       |
|---------------------------------------------|----------------------------------------------------------|-------------------------------------------------------------------------------------------|-----------------------------------------------------------------------------------------------------------------------------------------------------------------------------------------------------------------------------------------------------------------------------------------------------------------|------------------------------------------------------------------------------------------------------------------|---------------------------------------------------------------------------------------------------------------------------------------------------------------------------------------------------------------------------------------------------------------------------------------------------------------------------------------------------------------------------------------|
| CommCare<br>Svoronos et al<br>(2010) [27]   | Qualitative and<br>descriptive                           | Tanzania<br><br>Maternal Health<br><br>CHWs                                               | -Phone-based CommCare application including user-controlled guided decision support tool, checklist and follow-up reminders for quality improvement<br>-Use of patient data for referral support and monitoring<br>-Supervisory feedback and report generation<br>-Offline functionality<br>-Password protected | -Develop CommCare module                                                                                         | -Application was well received by CHWs and found to improve and standardize service delivery (identification, follow up and referral)<br>-Ease and comfort of use reported after some training<br>-Use of tool declined postimplementation                                                                                                                                            |
| mPneumonia<br>Ginsburg et al<br>(2015) [28] | Mixed methods<br>usability and<br>feasibility<br>testing | Ghana<br><br>Childhood<br>Illnesses<br><br>Lesser trained<br>health care<br>professionals | -Tablet-based tool with IMCI algorithm and decision-making protocol<br>-Coupled with “intelligent” electronic breath counter and paediatric pulse oximeter with visual, auditory, and vibratory feedback<br>-Offline functionality<br>-English language support<br>-Password protected                          | -Design and development of mPneumonia to improve diagnostic accuracy and facilitate guideline adherence by HCWs. | -HCWs positively responded to the mCDSS and found it innovative and easy.<br>-HCWs preferred it to standard (paper) practice, anticipating accurate and easier care management<br>-Concerns about maintenance and theft<br>-Identified 17 critical and 9 noncritical usability issues<br>-Increased ease of use with repetition<br>-Suggested at least 2 days (16.3hours) of training |

---

|                                                                                 |                                    |                    |                                                                                                                                                                                                                                  |                                                                                                                                                             |                                                                                                                                                                                                                                                                                                                                                                         |
|---------------------------------------------------------------------------------|------------------------------------|--------------------|----------------------------------------------------------------------------------------------------------------------------------------------------------------------------------------------------------------------------------|-------------------------------------------------------------------------------------------------------------------------------------------------------------|-------------------------------------------------------------------------------------------------------------------------------------------------------------------------------------------------------------------------------------------------------------------------------------------------------------------------------------------------------------------------|
| Basis (Basic Antenatal Care Information System)<br><br>Horner et al (2013) [29] | Before and after cohort study      | South Africa       | -Electronic patient information system with clinical decision support for maternal health via protocols, checklists, and a rule and knowledge base with alerts and reminders                                                     | -Usability and acceptability review<br>-Compliance (i.e. completion and response) performance for maternity care protocols and the antenatal care checklist | -Improved compliance from 85% to 89% although not statistically significant<br>-Out of nine specific categories for measuring compliance, three (compliance at booking, patients <18 years & booking patients after week 20) showed statistically significant results compared to standard practice using paper<br>-Better suited for younger computer literate workers |
|                                                                                 |                                    | Maternal Health    |                                                                                                                                                                                                                                  |                                                                                                                                                             |                                                                                                                                                                                                                                                                                                                                                                         |
|                                                                                 |                                    | Nurses             | -Supports patient data entry for classification, follow-up and referral, with validation and completeness checks                                                                                                                 |                                                                                                                                                             |                                                                                                                                                                                                                                                                                                                                                                         |
| TB Tech<br><br>Catalani et al (2014) [30]                                       | Mixed methods human-centred design | Kenya              | -Patient-specific decision support for provider action, education and behaviour change.<br>-Integrated paper-based processes with electronic medical record.<br>-Supported with educational and motivational information for HCW | -Develop, design and pilot test TBTech using a human-centred design approach                                                                                | -Positive disposition of clinicians to medical record and decision support system<br>-Concerns regarding accuracy and actionability of recommendations<br>-Health system challenges such as unavailability of tests, low staffing and supplies resulted in delayed action and some unactionable recommendations.                                                        |
|                                                                                 |                                    | Tuberculosis & HIV |                                                                                                                                                                                                                                  |                                                                                                                                                             |                                                                                                                                                                                                                                                                                                                                                                         |
|                                                                                 |                                    | Clinicians         | -Additional inputs including facility staffing and hardware upgrades, supply chain management and provision of mobile radiology units and educational campaign for providers                                                     |                                                                                                                                                             |                                                                                                                                                                                                                                                                                                                                                                         |

|                                                  |                                                                  |                                                                         |                                                                                                                                                                                         |                                                                                                                                                                                                                                                                                                                                                                                                                                          |                                                                                                                                                                                                                                                                                                                                                                                                                                                                                                                                                                                                                                                                             |
|--------------------------------------------------|------------------------------------------------------------------|-------------------------------------------------------------------------|-----------------------------------------------------------------------------------------------------------------------------------------------------------------------------------------|------------------------------------------------------------------------------------------------------------------------------------------------------------------------------------------------------------------------------------------------------------------------------------------------------------------------------------------------------------------------------------------------------------------------------------------|-----------------------------------------------------------------------------------------------------------------------------------------------------------------------------------------------------------------------------------------------------------------------------------------------------------------------------------------------------------------------------------------------------------------------------------------------------------------------------------------------------------------------------------------------------------------------------------------------------------------------------------------------------------------------------|
| txt2MEDLINE<br>Armstrong et al<br>(2012) [31]    | Pre-post utility<br>evaluation                                   | Botswana<br><br>Multiple domains<br><br>Clinicians of<br>varying cadres | -Mobile phone-based<br>two-way Short<br>Messaging Service<br>(SMS) of clinical<br>guidelines, with<br>MEDLINE query<br>function.                                                        | -Usability and usefulness<br>of intervention                                                                                                                                                                                                                                                                                                                                                                                             | -Although pre-intervention study<br>recorded high intention to use, this<br>declined during the one-month trial                                                                                                                                                                                                                                                                                                                                                                                                                                                                                                                                                             |
| ALMANACH<br>Shao et al (2015a,<br>2015b) [32,33] | Controlled non-<br>inferiority trial<br>and qualitative<br>study | Tanzania<br><br>Childhood<br>Illnesses<br><br>Clinicians                | -Smartphone or tablet<br>-Electronic medical<br>record system with<br>modified version of IMCI<br>algorithm<br>-Supported by point-of-<br>care tests and simple<br>clinical assessments | -Primary outcomes:<br>proportion of children<br>cured at day 7 and<br>proportion of children who<br>received antibiotics on day<br>zero<br>-Secondary outcomes:<br>proportion of children who<br>were admitted secondarily<br>or who died, and<br>proportion of children who<br>received antibiotics during<br>the study period<br>-Barriers and facilitators to<br>uptake of algorithm and<br>differences between<br>tablets and phones | -Antibiotic prescription reduced by<br>80% and study reported better<br>clinical outcomes due to increased<br>compliance to guidelines compared<br>to usual practice<br>-Ease and comfort of use, with<br>sustained rational judgment despite<br>certain recommendations by the<br>system<br>-HCWs reported that it made their<br>work efficient and effective<br>compared to usual practice, but<br>raised concerns about increased<br>consultation time and lack of<br>financial incentives for using the<br>service<br>-Patients trust in service delivery<br>improved, although health system<br>constraints hindered completion of<br>the actions and was demotivating |

---

|                                                                                                                    |                                          |                                                                      |                                                                                                                                                                                                                                              |                                                                                                                                                                                                                                                                       |                                                                                                                                                                                                                                                                                                                                                                                                                                                                                                                                                                                                                                                                                                                                                                                                                              |
|--------------------------------------------------------------------------------------------------------------------|------------------------------------------|----------------------------------------------------------------------|----------------------------------------------------------------------------------------------------------------------------------------------------------------------------------------------------------------------------------------------|-----------------------------------------------------------------------------------------------------------------------------------------------------------------------------------------------------------------------------------------------------------------------|------------------------------------------------------------------------------------------------------------------------------------------------------------------------------------------------------------------------------------------------------------------------------------------------------------------------------------------------------------------------------------------------------------------------------------------------------------------------------------------------------------------------------------------------------------------------------------------------------------------------------------------------------------------------------------------------------------------------------------------------------------------------------------------------------------------------------|
| eIMCI<br><br>Mitchell et al (2012); Mitchell et al (2013); DeRenzi et al (2008) [34-36]                            | Mixed methods before-after cluster trial | Tanzania<br><br>Childhood Illnesses<br><br>Health care professionals | -Personal Digital Assistant with guided decision support using Electronic IMCI protocols for stepwise examination, diagnosis and management.<br>-Algorithm included prompts based on data input.<br>-Language support in English and Swahili | -Perceptions of HCW and caretakers to eIMCI compared to standard paper formats<br>-Adherence to eIMCI guidelines compared to paper formats<br>-Impact of mHealth on quality of IMCI implementation (measured as complete assessment on 15 critical items of the IMCI) | -HCWs were positively predisposed to using the eIMCI; finding it faster and easier, and appreciating the stepwise guidance<br>-Caretakers reported improved assessment of their children and perceived that the eIMCI enhanced provider knowledge and skill<br>-Increased trust and confidence of caretakers in care provided.<br>-Some HCWs reported challenges with eIMCI recommendations that contradicted their preferred course of management<br>-Protocol adherence using eIMCI showed statistically significant improvement from 61%-98% in paper format, to 92%-100%.<br>-Completeness of assessment improved from 21% in the paper format to 71%, and was consistent across study clinics.<br>-Consultation time was not significantly different between the paper system (8.98minutes) and the eIMCI (9.06minutes) |
| Text Messaging of Malaria Guidelines<br><br>Jones et al (2012); Zurovac et al (2012); Zurovac et al (2011) [37-39] | Cluster randomised controlled trial      | Kenya<br><br>Malaria                                                 | -One-way SMS guidelines for outpatient management of malaria, supported by unique motivational messages<br>-English Language                                                                                                                 | -HCW perceptions, experiences and drivers of change of intervention<br>-Improved and maintained adherence guidelines for outpatient paediatric malaria<br>-Correct management with                                                                                    | -Improvement in correct management (24%), which was sustained (25%) up to 6months later<br>-Major improvements in tasks related to dispensing and counselling<br>-HCW responded to the intervention with enthusiasm, perceiving it as innovative, relevant and useful                                                                                                                                                                                                                                                                                                                                                                                                                                                                                                                                                        |

artemether-lumefantrine  
and effective counselling

-Most HCW were happy with content, frequency and timing of messages with few concerns about repetition and monotony  
-Intervention cost amounted to about US \$19,000, most (45%) of which was for development and pre-testing. Cost per additional child correctly managed was US \$0.50

Health workers

QUALMAT  
(Quality of  
Maternal and  
Prenatal Care)

Mixed methods  
quasi-  
experimental  
study

Tanzania, Ghana  
and Burkina Faso

Maternal and  
Prenatal Health

Health  
professionals  
(non-physicians)

-Guided computer-based decision support system integrated with patient data and algorithmic function for care management (antenatal till early postnatal care) and monitoring.  
-Includes educational training materials for health workers and an electronic partograph.  
-Additional intervention components include solar power, regular technical supervision, and performance-based incentives (PBI)

-Usability, acceptance and impact study  
-Assessment of effect on workflow  
-Improved quality of care through improved competence and motivation of HCW

### *General Findings*

-No clear difference between pre- and post-intervention quality scores and scores at non-intervention facilities.  
-Some variables were inconsistently statistically significant (e.g. in only one study arm, being pre- or post-intervention or intervention, non-intervention)  
-Post-intervention history taking, monitoring of mother, total technical and inter-personal performance scores were significantly better but remained unsatisfactory  
- Only care and examination of the newborn scored significantly better between intervention and non-intervention quality scores  
-Use of mCDSS was acceptable and feasible  
-Combining mCDSS and PBI did not improve quality of antenatal care

### *Ghana*

-Decreased proportion of delivery complications (from 10.7% to 9.6%)

deaths (from 4 to 1).  
-48% of financial implementation cost (apprx. US \$23,000) was for pre-intervention expenses  
-No significant increase in consultation time for ANC compared to control sites

#### *Tanzania*

-Total financial cost of implementation was about US \$185,000, 77% of which covered pre-intervention expenses.  
-No significant increase in consultation time for ANC in intervention sites compared to control sites

#### *Burkina Faso*

-HCW received mCDSS enthusiastically, expecting it to improve skill and over-reliance on referring patients.  
-Providers resisted use due to perceived increased workload and complexity of using the system

---

<sup>a</sup>mCDSS: mobile clinical decision support system.

<sup>b</sup>Although the m4Change study also used the CommCare app, we decided to treat them as independent studies because the interventions were only similar on a technical level and not part of an integrated multicountry study.

#### **Abbreviations**

ANC- Antenatal Care

CHEWs- Community Health Extension Workers

CHWs- Community Health Workers

HCWs- Health care Workers

IMCI- Integrated Management of Childhood Illness

mCDSS- mobile clinical decision support system

PHCs- Primary Healthcare Centre's
